# Supplementary material
Source: publisher site journal article supplement (https://static.cambridge.org/content/id/urn:cambridge.org:id:article:S0033822220000211/resource/name/S0033822220000211supp001.pdf)
Supplement: Supplementary file 1 [file S0033822220000211supp001.pdf]

# **Cathodoluminescence and laser-induced fluorescence of calcium carbonate: a review of screening methods for radiocarbon dating of ancient lime mortars**

Michael B. Toffolo<sup>1</sup>, Giulia Ricci<sup>2</sup>, Rémy Chapoulié<sup>1</sup>, Luisa Caneve<sup>3</sup>, Ifat Kaplan-Ashiri<sup>4</sup>

<sup>1</sup>Institut de Recherche sur les Archéomatériaux-Centre de Recherche en Physique Appliquée à l'Archéologie (IRAMAT-CRP2A), UMR 5060 CNRS, Université Bordeaux Montaigne, 8 Esplanade des Antilles, Pessac 33607, France.

<sup>2</sup>Dipartimento di Geoscienze, Università degli Studi di Padova, Via Giovanni Gradenigo 6, Padova 35131, Italy.

<sup>3</sup>ENEA, Technical Unit for the Development of Applications of Radiations, CR Frascati, Via Enrico Fermi 45, Frascati 00044, Italy.

<sup>4</sup>Department of Chemical Research Support, Weizmann Institute of Science, 234 Herzl Street, Rehovot 7610001, Israel.

## **Supplementary Information**

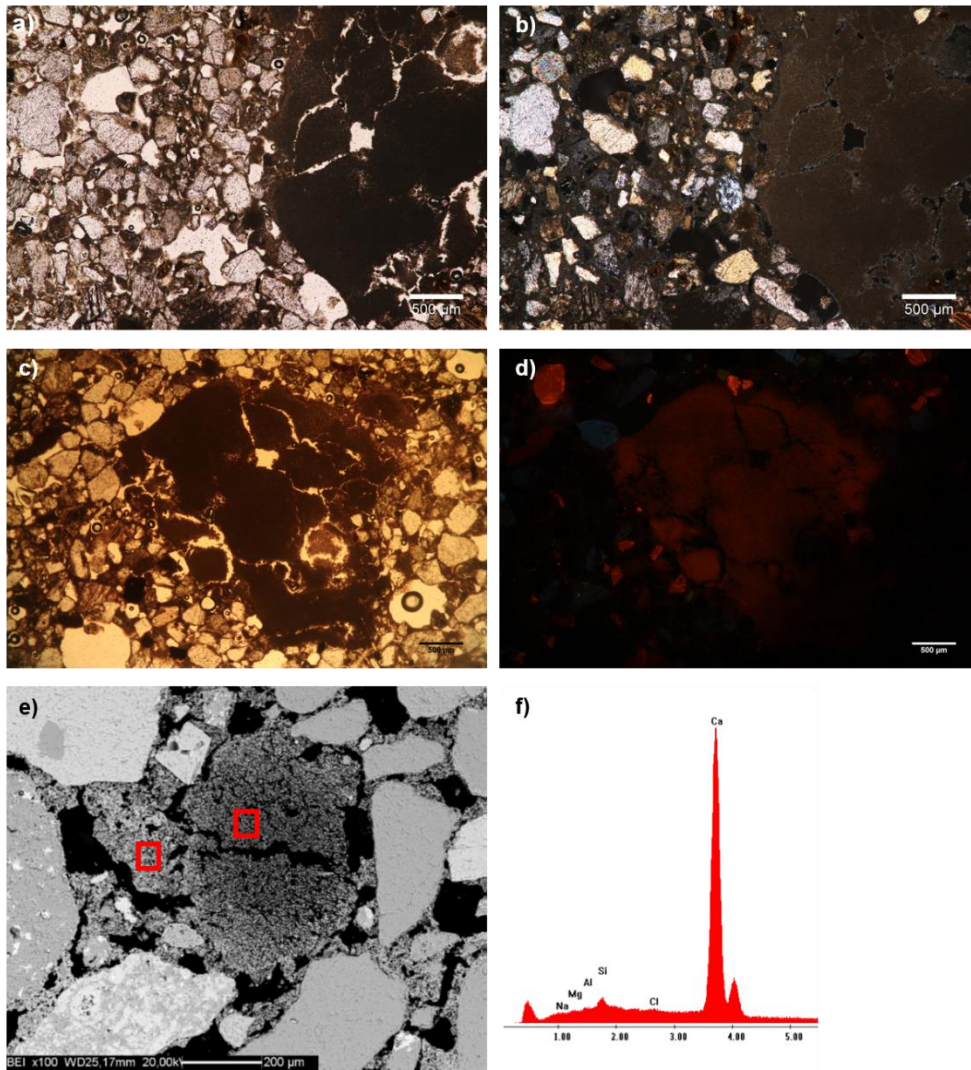

**Figure 1.** SS-V1 mortar sample. Transmitted light photomicrographs in parallel (a) and crossed (b) nicols; optical transmitted light (c) and cathodoluminescence optical spectroscopy (d); backscattered electron image (e) of a lime lump and EDS microanalysis (f) of the highlighted areas (lump and binder matrix).

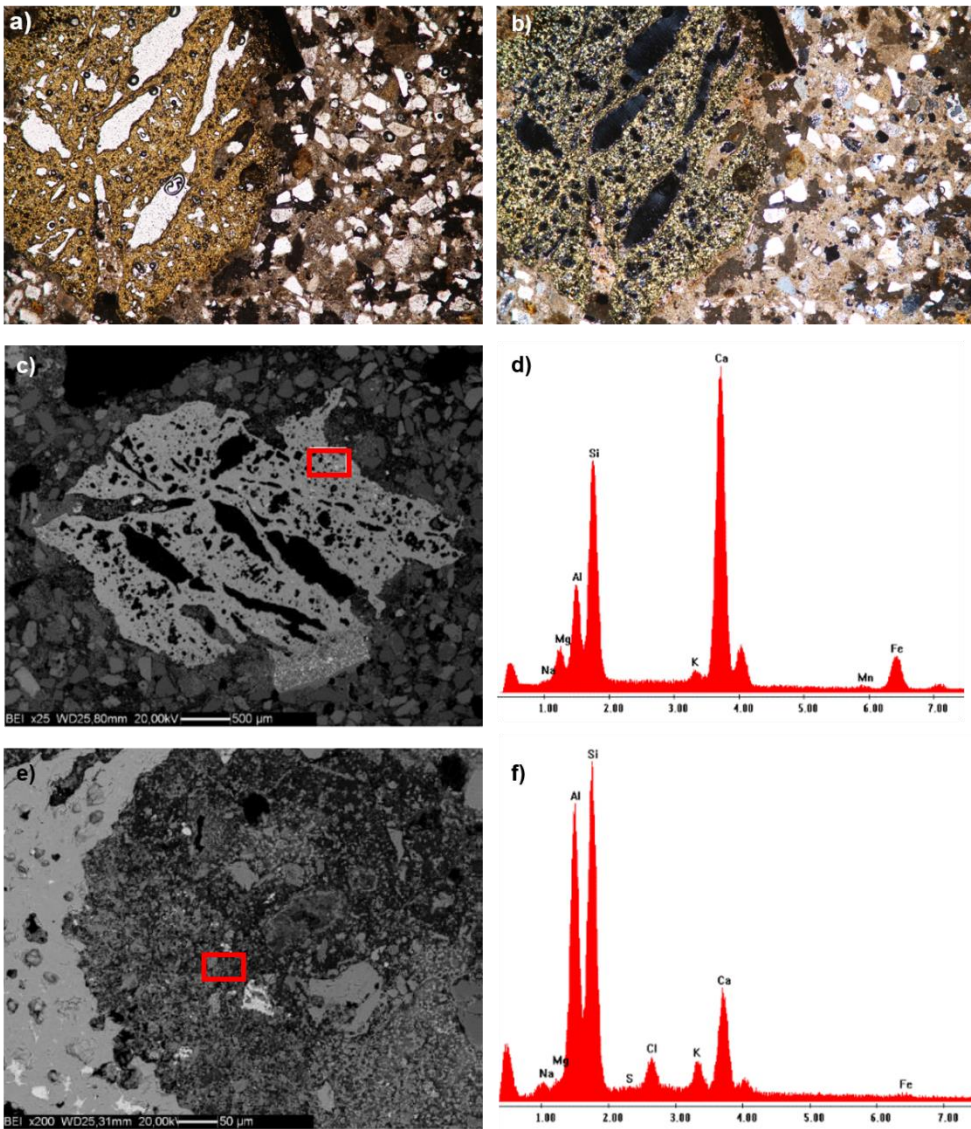

**Figure 2.** ML-1 mortar sample. Transmitted light photomicrographs in parallel (a) and crossed (b) nicols; backscattered electron image (c) of a secondary phase produced by the calcination process of a marlstone and EDS microanalysis of the highlighted area; backscattered electron image (e) of the binder matrix and EDS microanalysis (f) of the highlighted area.

Mineralogical and petrographic results showed that SS-V1 is an aerial mortar characterized by the presence of large lime lumps, silicate sand, phyllosilicates and very fine inclusions of calcite in a homogenous lime binder matrix (**Figure 1**) (Bergamo 2017). ML-1 exhibits quartz and feldspar as main aggregates, hydraulic phases (such as tobermorite and calcium aluminosilicates) derived from the use of marlstones in the calcination process, and a high amount of calcite (**Figure 2**) (Bandieri 2017).

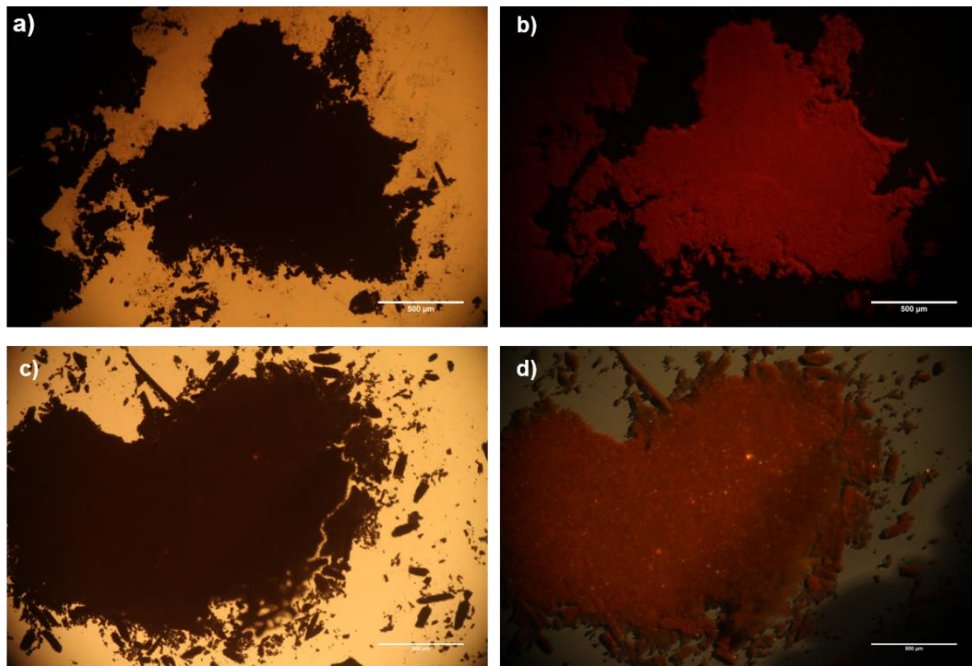

**Figure 3.** Binder fractions (SG) in powdered mortars SS-V1 and ML-1. Photomicrographs in optical transmitted light of SS-V1-SG and ML-1-SG (a and c, respectively) and cathodoluminescence optical spectroscopy of SS-V1-SG and ML-1-SG (b and d, respectively).

The shown OM-CL images were obtained using a NIKON Labophot2-POL microscope equipped with a cold cathode stage Cambridge Image Technology Ltd, CL8200 MK3 operated at 15kV and 200  $\mu$ A.
